# Supplementary material for: Genome Sequence and Characterization of a Xanthorhodopsin-Containing, Aerobic Anoxygenic Phototrophic Rhodobacter Species, Isolated from Mesophilic Conditions at Yellowstone National Park
Source: MDPI journal article supplement (doi:10.3390/microorganisms10061169), 2022-06-07
Supplement: s1 [file s1]

**Table S1.** *Rhodobacter* genomes used for the comparative study.

| Genome ID | Genome Name                                                      | Strain      | NCBI Taxon ID | Genome Status |
|-----------|------------------------------------------------------------------|-------------|---------------|---------------|
| 1054202.4 | <i>Rhodobacter viridis</i> strain JA737                          | JA737       | 1054202       | WGS           |
| 1061.5    | <i>Rhodobacter capsulatus</i> strain B41                         | B41         | 1061          | WGS           |
| 1061.6    | <i>Rhodobacter capsulatus</i> strain A52                         | A52         | 1061          | WGS           |
| 1061.9    | <i>Rhodobacter capsulatus</i> strain DSM 1710                    | DSM 1710    | 1061          | WGS           |
| 1062.4    | <i>Rhodobacter</i> sp. strain UBA9917                            | UBA9917     | 1062          | WGS           |
| 1062.5    | <i>Rhodobacter</i> sp. strain UBA12248                           | UBA12248    | 1062          | WGS           |
| 1062.6    | <i>Rhodobacter</i> sp. strain UBA9318                            | UBA9318     | 1062          | WGS           |
| 1062.8    | <i>Rhodobacter</i> sp. strain UBA10365                           | UBA10365    | 1062          | WGS           |
| 1063.1    | <i>Rhodobacter sphaeroides</i> strain MBTLJ-13                   | MBTLJ-13    | 1063          | Complete      |
| 1063.13   | <i>Rhodobacter sphaeroides</i> strain MBTLJ-20                   | MBTLJ-20    | 1063          | Complete      |
| 1063.28   | <i>Rhodobacter sphaeroides</i> strain YL101                      | YL101       | 1063          | WGS           |
| 1063.31   | <i>Rhodobacter sphaeroides</i> strain org#2181 strain 28/5       | 28/5        | 1063          | Complete      |
| 1063.32   | <i>Rhodobacter sphaeroides</i> strain S2_003_000_R2_11           | S2_003_000  | 1063          | WGS           |
| 1063.33   | <i>Rhodobacter sphaeroides</i> strain EBL0706                    | EBL0706     | 1063          | Complete      |
| 1063.34   | <i>Rhodobacter sphaeroides</i> strain FY                         | FY          | 1063          | WGS           |
| 1063.35   | <i>Rhodobacter sphaeroides</i> strain SCJ                        | SCJ         | 1063          | WGS           |
| 1063.4    | <i>Rhodobacter sphaeroides</i> strain AB25                       | AB25        | 1063          | Complete      |
| 1063.41   | <i>Rhodobacter sphaeroides</i> strain AB27                       | AB27        | 1063          | Complete      |
| 1063.42   | <i>Rhodobacter sphaeroides</i> strain AB29                       | AB29        | 1063          | Complete      |
| 1063.43   | <i>Rhodobacter sphaeroides</i> strain AB24                       | AB24        | 1063          | Complete      |
| 1063.9    | <i>Rhodobacter sphaeroides</i> strain MBTLJ-8                    | MBTLJ-8     | 1063          | Complete      |
| 1185920.4 | <i>Rhodobacter veldkampii</i> DSM 11550                          | DSM 11550   | 1185920       | WGS           |
| 1188249.3 | <i>Cereibacter changlensis</i> JA139                             | JA139       | 1188249       | WGS           |
| 1188250.3 | <i>Rhodobacter blasticus</i> DSM 2131                            | DSM 2131    | 1188250       | WGS           |
| 1247725.3 | <i>Rhodobacter</i> sp. AKP1                                      | AKP1        | 1247725       | WGS           |
| 1414586.3 | <i>Rhodobacter capsulatus</i> YW1                                | YW1         | 1414586       | WGS           |
| 1415159.3 | <i>Rhodobacter capsulatus</i> YW2                                | YW2         | 1415159       | WGS           |
| 1415160.3 | <i>Rhodobacter capsulatus</i> DE442                              | DE442       | 1415160       | WGS           |
| 1415161.3 | <i>Rhodobacter capsulatus</i> Y262                               | Y262        | 1415161       | WGS           |
| 1415162.4 | <i>Rhodobacter capsulatus</i> B6                                 | B6          | 1415162       | WGS           |
| 1415163.3 | <i>Rhodobacter capsulatus</i> R121                               | R121        | 1415163       | WGS           |
| 1655557.3 | <i>Rhodobacter</i> sp. BACL10 MAG-120419-bin15                   | BACL10 MAG  | 1655557       | WGS           |
| 1786003.4 | <i>Rhodobacter</i> sp. CCB-MM2                                   | CCB-MM2     | 1786003       | WGS           |
| 1850250.3 | <i>Rhodobacter</i> sp. LPB0142                                   | LPB0142     | 1850250       | Complete      |
| 1884310.3 | <i>Rhodobacter</i> sp. 24-YEA-8                                  | 24-YEA-8    | 1884310       | WGS           |
| 1985673.3 | <i>Rhodobacter</i> sp. CCP-1                                     | CCP-1       | 1985673       | WGS           |
| 2029399.6 | <i>Rhodobacter</i> sp. TJ_12                                     | TJ_12       | 2029399       | WGS           |
| 2033869.3 | <i>Rhodobacter</i> sp. CZR27                                     | CZR27       | 2033869       | Complete      |
| 2183910.3 | <i>Rhodobacter</i> sp. 140A                                      | 140A        | 2183910       | WGS           |
| 2249421.3 | <i>Rhodobacter</i> sp. YIM 73036                                 | YIM 73036   | 2670345       | WGS           |
| 2294033.3 | <i>Rhodobacter</i> sp. BO-81                                     | BO-81       | 2294033       | WGS           |
| 2528036.3 | <i>Rhodobacter</i> sp. YIM 73028                                 | YIM 73028   | 2528036       | WGS           |
| 2562317.3 | <i>Rhodobacter</i> sp. SY28-1                                    | SY28-1      | 2562317       | WGS           |
| 2584941.3 | <i>Rhodobacter</i> sp. JA983                                     | JA983       | 2584941       | WGS           |
| 2593019.3 | <i>Rhodobacter</i> sp. SYSU G02092                               | SYSU G0209  | 2593019       | WGS           |
| 2593020.3 | <i>Rhodobacter</i> sp. SYSU G02094                               | SYSU G0209  | 2593020       | WGS           |
| 2593021.3 | <i>Rhodobacter</i> sp. SYSU G03088                               | SYSU G0308  | 2593021       | WGS           |
| 2593022.3 | <i>Rhodobacter</i> sp. SYSU G02214                               | SYSU G0221  | 2593022       | WGS           |
| 2715277.3 | <i>Rhodobacter</i> sp. M37P                                      | M37P        | 2715277       | WGS           |
| 272942.6  | <i>Rhodobacter capsulatus</i> SB 1003                            | SB1003      | 272942        | Complete      |
| 272943.71 | <i>Rhodobacter sphaeroides</i> 2.4.1                             | 2.4.1       | 272943        | Complete      |
| 2759676.3 | <i>Rhodobacter</i> sp. NTK016B                                   | NTK016B     | 2759676       | WGS           |
| 2807096.3 | <i>Rhodobacter</i> sp. N10                                       | N10         | 2807096       | Complete      |
| 2852097.3 | <i>Rhodobacter</i> sp. HSP-20                                    | HSP-20      | 2852097       | WGS           |
| 2883999.5 | <i>Rhodobacter</i> sp. Har01                                     | Har01       | 2883999       | WGS           |
| 349101.6  | <i>Rhodobacter sphaeroides</i> ATCC 17029                        | ATCC 17029  | 349101        | Complete      |
| 349102.13 | <i>Rhodobacter sphaeroides</i> ATCC 17025                        | ATCC 17025  | 349102        | Complete      |
| 371731.3  | <i>Rhodobacter</i> sp. SW2                                       | SW2         | 371731        | WGS           |
| 39723.4   | <i>Rhodobacter sphaeroides</i> f. sp. denitrificans strain IL106 | IL106       | 39723         | WGS           |
| 407234.3  | <i>Rhodobacter vinaykumarii</i> strain DSM 18714                 | DSM 18714   | 407234        | WGS           |
| 407234.6  | <i>Rhodobacter vinaykumarii</i> strain JA123                     | JA123       | 407234        | WGS           |
| 418630.3  | <i>Rhodobacter megalophilus</i> strain DSM 18937                 | DSM 18937   | 418630        | WGS           |
| 43057.4   | <i>Rhodobacter azotoformans</i> strain YLK20                     | YLK20       | 43057         | WGS           |
| 43057.6   | <i>Rhodobacter azotoformans</i> strain KA25                      | KA25        | 43057         | WGS           |
| 439529.3  | <i>Rhodobacter ovatus</i> strain JA234                           | JA234       | 439529        | WGS           |
| 445629.8  | <i>Rhodobacter johrii</i> strain JA192                           | JA192       | 445629        | WGS           |
| 445629.9  | <i>Rhodobacter johrii</i> strain CDR-SL 7Cii                     | CDR-SL 7Cii | 445629        | WGS           |
| 446682.3  | <i>Rhodobacter maris</i> strain JA276                            | JA276       | 446682        | WGS           |
| 449393.3  | <i>Rhodobacter</i> sp. Q27b                                      | Q27b        | 1408890       | WGS           |
| 453582.3  | <i>Rhodobacter aestuarii</i> strain DSM 19945                    | DSM 19945   | 453582        | WGS           |
| 453582.5  | <i>Rhodobacter aestuarii</i> strain JA296                        | JA296       | 453582        | WGS           |
| 557760.5  | <i>Rhodobacter sphaeroides</i> KD131                             | KD131       | 557760        | Complete      |
| 570013.3  | <i>Rhodobacter</i> sp. JA431                                     | JA431       | 570013        | WGS           |
| 992186.3  | <i>Rhodobacter sphaeroides</i> WS8N                              | WS8N        | 992186        | WGS           |
